# Supplementary material for: Contrasting characteristic behaviours among common laboratory mouse strains
Source: R Soc Open Sci. 2019 Jun 12;6(6):190574. doi: 10.1098/rsos.190574 (PMC6599779; doi:10.1098/rsos.190574)
Supplement: Sultana_Raw behavioral data_ESM [file rsos190574supp1.xlsx]

## Sheet: Sheet1
Strains	S.No.	Percent time spent with S1	Percent time spent with S2	Activity in terms of total distance inside apparatus	Number of entries into compartments	Number of poops	Percent time spent at the periphery	Percent time spent at center (100-% time at the periphery)	Mean speed	% spontaneous alternation	% Perseveration	% Incorrect entries	% correct arm entries	Forecd swim test (% moblity time)	Tail suspension tes ( mobility time in seconds)	Tail suspension tes ( mobility time in Percent)	Number of stress calls/6 minutes
C57BL6J	1	39.3559	64.3371	10.285	92	0	75.1	24.9	3.5	20	2.7027	5.40541	11.4942	40.8333	104	43.3333	7
	2	20	55.9962	14.482	147	3	26.6	73.4	4.9	24	0	11.1111	13.4615	66.25	120	50	2
	3	33.0508	68.3047	12.988	164	3	37.2	62.8	4.4	17.8571	6.66667	16.6667	15.2778	65	123	51.25	23
	4	32.6102	74.2588	12.925	164	3	32.4	67.6	4.4	16.6667	0	18.75	13.0952	46.25	130	54.1667	7
	5	41.4915	60.7352	12.407	138	0	55.4	44.6	4.2	14.8148	10.3448	10.3448	15.7895	62.5	120	50	4
	6	44.3729	59.988	8.169	64	0	84.4	15.6	2.8	35.2941	0	5.26316	20	52.9167	116	48.3333	3
	7	39.3559	63.1324	12.223	104	1	66.6	33.4	4.1				16.3636	30	164	68.3333	5
	8	20	44.8781	3.073	18	2	99.4	0.6	1				50.1313	58.3333	115	47.9167	3
	9	33.0508	53.8093	5.849	46	2	93.1	6.9	2				54.7642	55.4167	135	56.25	7
	10	32.6102	52.5167	11.268	130	1	7.7	92.3	3.8				28.3936	52.9167	161	67.0833	7
	11	41.4915	62.4932	9.726	77	4	69.8	30.2	3.3				35.1027
	12	44.3729	58.9024	10.556	73	4	72.1	27.9	3.6
129SvEv	1	4.0678	0	1.875	14	1	97.1	2.9	2.7	14.2857	33.3333	11.1111	15	39.5833	94	39.1667	5
	2	96.678	0	6.348	36	2	94.7	5.3	2.2	20	13.6364	9.09091	4.54545	28.3333	38	15.8333	2
	3	1.18644	58.7874	1.13	9	3	83.3	16.7	0.4	11.1111	30	20	12.3288	24.5833	74	30.8333	2
	4	1.83051	59.654	1.131	35	5	100	0	0.4	12.5	27.7778	16.6667	3.22581	30	91	37.9167	1
	5	0	22.0641	4.915	29	0	100	0	1.7	15.3846	0	20	15.7895	10	88	36.6667	2
	6	97.3898	52.0299	0.774	3	7	100	0	0.3	17.3913	0	20	20	33.3333	64	26.6667	0
	7	19.6271	35.0649	1.422	18	3	94.3	5.7	0.5				16.3636	15.4167	65	27.0833	0
	8	45.6949	0	2.975	40	4	92.3	7.7	1				9.43396	36.6667	92	38.3333	3
	9	0	0	2.03	14	2	100	0	2.3					26.6667	65	27.0833	1
	10	98.5085	47.402	5.589	55	5	98	2	1.9					40	105	43.75	0
	11	96.5085	0	0.511	54	4	62.6	37.4	0.3					48.75	74	30.8333	0
	12	48.0339	40.0778	2.083	3	4	100	0	0.7					31.6667	57	23.75	0
	13	2.64407	38.2345	1.884	5	3	98.2	1.8	0.8					49.5833	86	35.8333	0
	14	7.72881	22.5674	7.949	81	0	95.1	4.9	2.7					29.1667	99	41.25	0
	15	84.1356	0	4.081	21	6	87.6	12.4	1.4					26.25
	16	35.2203	0	3.253	15	2	100	0	1.1					41.25
BALB/c	1	100	68.5596	1.213	27	4	36	64	0.4	25	0	16.6667	21.4286	57.5	108	45	3
	2	0	73.2973	0.907	6	3	88.9	11.1	0.3	19.0476	13.0435	13.0435	40	38.75	168	70	0
	3	28.3019	68.9873	3.531	34	2	90.9	9.1	1.2	18.1818	7.69231	23.0769	33.3333	64.1667	210	87.5	1
	4	21.8876	94.0511	2.405	34	5	23.7	76.3	0.8	16	14.8148	14.8148	41.1765	59.5833	124	51.6667	5
	5	22.032	71.6298	7.018	63	4	63	37	2.4	23.5294	5.26316	15.7895	44.4444	53.3333	138	57.5	1
	6	2.03715	100	2.594	39	3	74	26	0.9	20	3.7037	11.1111	47.8261	79.1667	140	58.3333	4
	7	80.303	100	3.089	3	0	92.4	7.6	1.1					58.3333	167	69.5833	4
	8	0	61.6456	1.78	3	0	100	0	0.7					69.76	178	74.1667	0
CBA	1	100	65.6452	2.05	26	10	78.6	21.4	0.7	25	2.63158	28.9474	55.5556	45	131	54.5833	4
	2	20.5818	51.5137	2.58	24	4	65.5	34.5	0.9	20	0	37.5	31.25	64.5833	112	46.6667	2
	3	65.019	67.4699	2.741	47	3	65.7	34.3	0.9	25	5.26316	7.89474	46.6667	40	155	64.5833	3
	4	21.8017	43.017	3.225	36	2	66	34	1.1	25.8065	3.0303	12.1212	37.037	35.8333	150	62.5	1
	5	100	32.7225	3.253	38	8	31.9	68.1	1.1	20	0	27.2727	29.4118	73.75	114	47.5	6
	6	100	45.2967	3.915	26	3	82.1	17.9	1.3	22.2222	7.89474	7.89474	30	42.5	180	75	2
	7	36.3861	75.0896	2.125	28	8	57.1	42.9	0.7					33.75	144	60	2
	8	22.956	80.5649	2.513	9	5	100	0	0.9					50	95	39.5833	4
	9	56.6754	78.2862	3.325	23	3	88.3	11.7	1.1					39.5833	154	64.1667	0
	10	53.2341	52.7459	4.296	39	2	87.5	12.5	1.5					85	143	59.5833	0
	11	33.3425	66.2367	4.365	35	4	97	3	1.5					41.6667
														69.1667
CD1	1	71.7685	75.4871	8.502	108	0	94.8	5.2	2.9	25.5814	0	13.3333	50	75	103	42.9167	1
	2	47.7758	49.9066	7.847	45	2	96.1	3.9	2.7	16.2791	4.44444	17.7778	35.2941	41.25	180	75	8
	3	62.6469	75.2141	8.542	37	2	93.4	6.6	2.9	16.3934	0	25.3968	63.6364	50	77	32.0833	1
	4	33.4078	65.7014	7.304	42	0	100	0	2.5	21.6216	5.12821	15.3846	45	68.3333	120	50	3
	5	60.491	71.9416	1.147	17	0	92.1	7.9	0.4	21.2766	6.12245	6.12245	63.6364	50	116	48.3333	1
	6	36.7276	61.2587	8.8	51	5	91	9	3	26.4706	0	8.33333	44	56.25	158	65.8333	2
	7	63.2733	75.8403	10.626	67	0	79.6	20.4	3.6					80	86	35.8333	2
	8	68.7527	68.4561	6.674	51	0	96.1	3.9	2.3					62.9167	76	31.6667	5
	9	76.3761	70.7823	5.605	32	0	87.3	12.7	1.9					70.4167	105	43.75	0
	10	61.9231	48.7826	9.709	64	0	88.5	11.5	3.3					40.4167	163	67.9167	0
	11	66.0833	52.5637	7.049	54	0	83.3	16.7	2.4					60.4167
	12	60.2341	50.4635	5.212	31	2	88.1	11.9	1.8
